# Supplementary material
Source: publisher figshare collection journal article supplement (https://gsajournals.figshare.com/ndownloader/files/21214959)
Supplement: Supplementary file 1 [file 21214959]

Table S2. SNP and individual QC filter table. Number of animals and SNPs remained after each step of filtering are shown per GBS SNP set.,,,,,,,
,,,,,,,
,,Number of SNPs retained,,,Number of animals retained,,
Filter Stype,Filter Step,F34,F39-F43,"F34, F39-43",F34,F39-F43,"F34, F39-43"
SNP,Post ANGSD,1710935,,,448,649,1097
SNP,Post Beagle within-sample imputation and MAF 0.05 filtering,193708,,,448,649,1097
SNP,Dosage R2 > 0.9,69000,,,448,649,1097
ID,Heterozygosity < 3 s.d. from the mean,69000,,,447,625,1072
ID,Number of reads mapped to chrX : chrY,69000,,,440,618,1058
ID,Kinship relatedness matrix calculated by pedigree (QTLRel) and genoytpes (IBDLD),69000,,,435,614,1049
ID,Albinism and genotypes at Tyr mismatch,69000,,,430,600,1030
ID,F34 animals genotyped by both array and GBS,69000,,,428,600,1028
SNP,"MAF > 0.1, Chi-square P value of Hardy�Weinberg Equilibrium > 1.0�10-6 (autosomes only)",60392,59790,58461,428,600,1028
